1 **Temperature shapes oviposition site selection and post-oviposition egg**  
2 **transport in an insect with parental care**

3 Jean-Claude Tourneur<sup>1</sup>, Claire Cole<sup>2</sup>, Jess Vickruck<sup>3</sup>, Simon Dupont<sup>4</sup> and Joël Meunier<sup>4\*</sup>

4 <sup>1</sup> Département des Sciences Biologiques, Université du Québec à Montréal, 141 Avenue du  
5 Président-Kennedy, Montréal, Québec, H2X 1Y4, Canada

6 <sup>2</sup> Wilfred Avenue, Fredericton, New Brunswick, E3B 9R9, Canada

7 <sup>3</sup> Fredericton Research and Development Centre, Agriculture and Agri-Food Canada, 95  
8 innovation Rd, Fredericton, New Brunswick, E3B 4Z7, Canada

9 <sup>4</sup> Institut de Recherche sur la Biologie de l’Insecte (IRBI), Unité mixte de recherche 7261,  
10 Centre national de la recherche scientifique, Université de Tours, Tours, France

11 \* Corresponding author: [joel.meunier@univ-tours.fr](mailto:joel.meunier@univ-tours.fr)

## ABSTRACT

12 Depositing eggs in an area with adequate temperature is often crucial for mothers and their  
13 offspring, as the eggs are immobile and therefore cannot avoid exposure to sub-optimal  
14 temperatures. However, the importance of temperature on oviposition site selection is less  
15 clear when mothers have the capability to avoid these potential adverse effects by both  
16 moving their eggs after oviposition and providing other forms of egg care. In this study, we  
17 addressed this question in the European earwig, an insect in which mothers care for the eggs  
18 during several months in winter and often move them during this period. Using 60 females  
19 from two Canadian populations (St John's and Harvey station) set up under controlled thermal  
20 gradients, we demonstrated that earwig females both select oviposition sites according to  
21 temperature and move their eggs after oviposition to reach warmer environmental  
22 temperatures. While this set of behavioural thermoregulation is present in the two studied  
23 populations, its modality of expression was population-specific: St John's females explored  
24 greater ranges of temperatures before oviposition, laid their eggs in warmer areas, and moved  
25 their eggs quicker toward warm locations. Overall, our study reveals that earwig females have  
26 evolved both pre-and post-oviposition behavioural strategies to mitigate the risks inherent to  
27 tending eggs during winter. More generally, it also reveals that egg care and egg transport do  
28 not prevent behavioural thermoregulation via oviposition site selection and highlights the  
29 diversity of behaviours that insects can adopt to enhance their tolerance to global climate  
30 change.

31 **Keywords:** Dermaptera, Egg brooding, Overwinter, Parental care, Thermal preferences

## INTRODUCTION

32 Oviposition site selection shapes the fitness of most oviparous species (Thompson 1988,  
33 Refsnider and Janzen 2010). This is because choosing the right place to deposit eggs typically  
34 provides direct and indirect benefits to egg-laying females, their current eggs, and their future  
35 juveniles. This behaviour may first limit the high risk of predation on adult females that is  
36 inherent to their lack of mobility during oviposition, as well as favour their direct access to  
37 specific food sources necessary for oviposition. For instance, females of the water strider  
38 *Aquarius paludum insularis* avoid ovipositing in sites containing a predator attacking adults  
39 only (Hirayama and Kasuya 2013), while females of the orange tip butterfly *Anthocharis*  
40 *cardamines* deposit eggs on plants that have high nutritional value for adults but poor  
41 nutritional value for their larvae (Courtney 1981). Oviposition site selection can also help  
42 future offspring by favouring proximity to suitable habitat and providing direct access to  
43 resources necessary for juveniles. This is the case in the mosquitoes *Culiseta longiareolata* and  
44 *Anopheles punctipennis*, where females avoid laying eggs in ponds containing predators or  
45 competitors of their future larvae (Petranka and Fakhoury 1991, Spencer et al. 2002,  
46 Silberbush and Blaustein 2011) and in the sandpaper frog *Lechriodus fletcher* and several lady  
47 beetle species, where females choose oviposition sites that contain the largest quantities of  
48 nutritive resources for their future larvae (Sicsú et al. 2020, Gould et al. 2021). Finally,  
49 oviposition site selection can provide direct benefits to eggs by limiting the risks of predators  
50 finding the eggs, eggs drying out or egg exposure to toxic pollutants. In the aquatic beetles  
51 *Hydroporus incognitus* and *H. nigrita*, for example, females select waters where no fish can  
52 predate on their eggs (Brodin et al. 2006), while in the damselfly *Lestes macrostigmata*,  
53 females prefer to lay their eggs on plants growing in the deeper parts of temporary ponds to  
54 minimize the risk of egg desiccation at the end of the drought season (Lambret et al. 2018).

55 Similarly in the gray treefrog *Hyla versicolor* and two mosquito species, females avoid ponds  
56 contaminated with pesticides and chemical pollutants that could be toxic to their eggs  
57 (Takahashi 2007, Muturi et al. 2014).

58 The effect of temperature on egg development and survival is another potential driver  
59 of oviposition site selection by females. Exposure to extreme temperatures can indeed  
60 damage living organisms of all ages, through alterations in their physiology, immunity and  
61 behaviour, which may overall reduce their fitness and/or lead to premature death (Hance et  
62 al. 2007, Dillon et al. 2009, Fey et al. 2015, Filazzola et al. 2021). These effects can be  
63 particularly strong in eggs because they are immobile and thus unable to escape from  
64 environmental temperatures, their shell provides limited thermal protection, and the  
65 development and survival of embryos (contained in eggs) are generally sensitive to subtle  
66 changes in surrounding temperatures (Wang et al. 2010, Nicolai et al. 2013, Mortola and  
67 Gaonac'h-Lovejoy 2016, Cordero et al. 2018, Yang et al. 2018). As a result, females of many  
68 species select oviposition sites according to optimal temperatures for their eggs, such as in  
69 the toad-headed agama lizard *Phrynocephalus przewalskii* (Li et al. 2018), the solitary red  
70 mason bee *Osmia bicornis* (Ostap-Chec et al. 2021) and the flat-rock spiders *Hemicloea major*  
71 (Pike et al. 2012).

72 By contrast, the importance of temperature on oviposition site selection becomes less  
73 clear when mothers can transport their eggs from one location to another, as it may allow  
74 them to secondarily adjust the temperature of their eggs throughout development. This  
75 transport, included in a broader phenomenon called egg brooding in insects (Machado and  
76 Trumbo 2018), is known to allow parents to limit the risk of egg predations or promote egg  
77 oxygenation in aquatic species. For instance in the golden egg bug *Phyllomorpha laciniata*,

78 females lay their eggs on conspecifics whose mobility improves the avoidance of egg  
79 parasitoids (Carrasco and Kaitala 2009). Similarly in the water bug *Abedus herbeti*, females lay  
80 their eggs on the males' back, which then move (with the eggs) to ensure that they receive a  
81 proper level of oxygenation (Smith 1997). However, whether active egg transport (e.g. parents  
82 actively moving their eggs from one location to another by holding them between their mouth  
83 parts) could be an adaptive behaviour by which mothers adjust the thermal needs of the  
84 embryo during development remains unexplored. Yet, this process could operate in the  
85 European earwig *Forficula auricularia*. In this complex of cryptic species (Wirth et al. 1998,  
86 González-Miguéns et al. 2020), females usually lay their eggs just before winter (or during  
87 winter), and then remain with their eggs until hatching (Lamb 1976). During this period,  
88 females provide extensive forms of egg care including, for instance, grooming behaviours to  
89 remove pathogens and applying chemical compounds on eggshells (Liu et al. 1997, Boos et al.  
90 2014) and fierce protection against predators (Thesing et al. 2015, Van Meyel et al. 2019).  
91 Moreover, females are frequently observed transporting their eggs from one location to  
92 another by holding them individually between their mouth parts (Diehl and Meunier 2018,  
93 Meunier et al. 2020).

94       Recent results and observations suggest that earwig eggs could benefit from  
95 temperature-dependent oviposition site selection and temperature-dependent maternal  
96 transport during development. First, the duration of egg development in winter varies from  
97 three weeks to several months depending on the population (Ratz et al. 2016, Tourneur 2018).  
98 This suggests that eggs could be exposed to extremely low (and damaging) temperatures for  
99 a very long time if females do not select the oviposition site accordingly and/or do not  
100 transport the eggs during development - particularly in natural populations in North America  
101 (Gingras and Tourneur 2001, Tourneur and Meunier 2020). Second, eggs exposure to cold can

102 have both short and long-term effects on fitness-related traits in the European earwig: shorter  
103 exposure to cold speeds up egg hatching, accelerates the development of the resulting  
104 offspring to adulthood, and alters the immune system of the resulting adults (Körner et al.  
105 2018). Finally, numerous laboratory breeding trials indicate that eggs of some populations  
106 need to be exposed to near-zero temperatures to trigger embryo development and then the  
107 temperature needs to be increased to continue this development, while others do not (e.g.  
108 Wirth et al. 1998; Meunier et al. 2012; Ratz et al. 2016; Tourneur and Meunier 2020).

109 In this study, we investigated whether European earwig females select an oviposition  
110 site according to environmental temperature, move their eggs depending on both  
111 environmental temperature and eggs age, and whether these behaviours are population  
112 specific. We set up 60 females from two Canadian populations in experimental devices  
113 allowing thermal gradients and then recorded 1) the range of temperatures explored by each  
114 female during the 15 days preceding oviposition, 2) the temperature at which females laid  
115 their eggs, 3) whether and how mothers transported their clutch along three thermal  
116 gradients throughout egg development and finally, 4) how these gradients affected juveniles  
117 production. Overall, our results reveal that environmental temperature shapes female  
118 exploration before oviposition, oviposition site selection, egg transport during development  
119 and the production of juveniles and that both oviposition site selection and the dynamic of  
120 egg transport during development are population specific.

## **MATERIAL AND METHODS**

### **121 Earwig sampling and experimental process**

122 We field sampled earwig males and females in Harvey station (New Brunswick, Canada; HNB)  
123 and St John's (Newfoundland and Labrador, Canada; SJNL) in September 2020. We  
124 immediately brought back these adults to the laboratory and set them up in plastic containers  
125 lined with wet sand and containing two small shelters. We maintained these containers at  
126 room temperature under natural day: light until October 2020. At that time, we transferred  
127 36 females (18 from HNB and 18 from SJNL) to the middle of individual aluminium rails (18 x  
128 18 x 720 mm = height x width x length) lined with a layer of wet sand and closed with a plastic  
129 cover. We then deposited the aluminium rails on thermal bridges (AHP-1200CPV-  
130 Thermoelectric Cooling America Corporation, 4049W Schubert Avenue, Chicago IL, USA) with  
131 temperatures linearly ranging from 0°C to 20°C (Figure S1) and insulated with thick foam to  
132 ensure complete darkness. To determine the temperature range explored by each female  
133 before egg-laying, we then measured the distance between these females and the coldest  
134 edge of the rail daily until they laid eggs. To limit stress on the females due to rail handling,  
135 we divided each rail into 12 zones of 60 mm length and defined the distance between a female  
136 and the coldest edge as the centre of the zone she was in. Finally, to increase the number of  
137 females with eggs available for the second part of the experiment, we also isolated 24  
138 additional females (12 from HNB and 12 from SJNL) in Petri dishes (diameter 10 cm) lined with  
139 wet sand and maintained at 10°C under complete darkness until egg production. From field  
140 sampling to oviposition, we fed the 36 and 24 females twice a week with fresh carrots placed  
141 on a soaked cotton pad, plus an artificial diet composed of 1/3 dry power of egg yolk, 1/3 bee  
142 collected pollen (Community Apiaries, 576 Plymouth road, Richmond Corner, New-Brunswick,  
143 Canada) and 1/3 cricket powder (Entomo Farms, 31 industrial drive Norwood, Ontario,  
144 Canada).

145           Three days after oviposition, we transferred the 36 mothers and eggs previously  
146 maintained in aluminium rails and the 24 mothers and eggs previously maintained in Petri  
147 dishes to the middle of shorter aluminium rails (18 x 18 x 660 mm) also lined with a layer of  
148 wet sand and closed with a plastic cover to ensure complete darkness. We then deposited  
149 these aluminium rails into a climate cabinet (insulated with 2 thick foam to ensure complete  
150 darkness; 24h) providing either warm (0.87°C to 6.96°C; 10 HNB and 10 SJNL females),  
151 intermediate (-3.64°C to 2.73°C; 10 HNB and 10 SJNL females) or cold (-4.45°C to 1.61°C; 10  
152 HNB and 10 SJNL females) non-linear thermal ranges (Figure S2), with eggs deposited at  
153 5.22°C, 1.18°C and 0.11°C, respectively. These temperature ranges encompass the above-  
154 ground variation in temperatures measured in these populations during the natural period of  
155 egg care (Gingras and Tourneur 2001)(Figure 1). To test whether and how mothers  
156 transported their clutch throughout egg development, we then measured the distance  
157 between the centre of the clutch of eggs and the coldest edge of the rail once a week during  
158 the 15 following weeks. Because rail handling occurred only weekly in this part of the  
159 experiment, we measured the distances between the (center of the pile of) eggs and cold edge  
160 directly in cm. Note that the rails used in the climatic cabinet were slightly shorter than those  
161 used in the thermal bridge because they had to fit into the climatic cabinet which was  
162 shallower.

163           Fifteen weeks after oviposition, we transferred the shorter aluminium rails of a random  
164 subset of 10 mothers and eggs per thermal range and population (i.e. a total of 60 mothers  
165 and eggs) to the thermal bridges used before oviposition (see above). We then checked every  
166 rail daily to record the date of egg hatching, the location of the clutch at hatching (based on  
167 the distance between the centre of the clutch and the coldest edge of the rail) and more  
168 generally, to determine whether at least one egg eventually hatched. We did not feed females



169 from the day of oviposition to egg hatching, as earwig mothers typically stop foraging during  
170 this period (Kölliker 2007).

171 We measured the thermal gradients present in the aluminium rails using  
172 thermometers (4 channel K type Thermometers SD. Amazon. CA) connected to four probes  
173 located in the sand either at 2, 25.5, 49 and 72 cm (longer aluminium rails) or 1.5, 22.5, 43.5  
174 and 64.5 cm (shorter aluminium rails) of the coldest edge of the rails. The recordings occurred  
175 every hour during the entire experiment and focused on four aluminium rails for  
176 measurements conducted 15 days before oviposition and after the 15 weeks following  
177 oviposition (thermal bridges), and six aluminium rails distributed among the three thermal  
178 constraints for measurements conducted during the 15 weeks following oviposition (climate  
179 cabinet). We then used these recordings to compute linear (thermal bridges) and non-linear  
180 (climate cabinet) equations linking distance to temperature (Figures S1 and S2), which we then  
181 used to obtain the temperature of the location of the females and their eggs.

## 182 **Genetic analyses**

183 To determine whether HNB and SJNL females belonged to the same subspecies of the  
184 European earwig (Wirth et al. 1998, González-Miguéns et al. 2020), we analysed the  
185 Cytochrome Oxidase I (COI) gene of 6 females per population. This number of females is  
186 enough to robustly assess the origin of an entire population, as previous work demonstrated  
187 that the two species do not co-exist in the same population (Wirth et al. 1998, Guillet et al.  
188 2000b). Genomic DNA was extracted from whole individuals with the NucleoMag® Tissue kit  
189 (Macherey Nagel) following manufacturer instructions. The COI gene (658 bp) was amplified  
190 from each individual using routine barcoding primers LepF and LepR (Hajibabaei et al. 2006).

191 PCR amplifications was performed with the DreamTaq® PCR Master Mix Kit (Thermo Scientific)  
192 using an ESCO Swift Maxi® thermocycler with an initial denaturation step at 95°C (2 min)  
193 followed by 35 cycles at 95°C (45 sec), 52°C (60 sec) and 72°C (90 sec) and finally an extension  
194 step at 72°C (10 min). PCR products were purified, and Sanger sequenced in both direction  
195 using an ABI 3730XL sequencing system (Thermo Fisher Scientific) at Eurofins Genomics  
196 Company. Sequences obtained were corrected using Geneious® 9.1.8. The subspecies status  
197 of each female was identified from NCBI databases using the BLAST tool (Altschul et al. 1990).  
198 The BLAST results were ranked by percent identity and the reference sequences with at least  
199 100% identity to our sequences were used to assign the subspecies status. All sequences  
200 obtained in this study have been submitted to GenBank; their accession numbers are  
201 OL512959 to OL512964 for the 6 HNB females and OL512965 to OL512970 for the 6 SJNL  
202 females.

### 203 **Statistical analyses**

204 We used a series of eight Exact Mann-Whitney Rank Sum tests correcting for tied observations  
205 to test the effect of population on the warmest and coldest temperatures reached by females  
206 before oviposition, the amplitude of temperatures at which females were observed before  
207 oviposition, the location of females at oviposition, the date of oviposition, the number of eggs  
208 produced, the temperature of the area of egg hatching and the number of weeks until egg  
209 hatching. Potential changes in the location of the clutch after oviposition were analysed using  
210 Linear Mixed-effects models in which the week (1 to 15), population (SJNL and HNB), range of  
211 temperature (warm, intermediate and cold) and the interaction between these three factors  
212 were entered as explanatory factors, while the ID of each female was used as a random factor

213 to correct for multiple measurements. To interpret the significant interaction between these  
214 three factors, we first run the same models for each range of temperature (thus without  
215 temperature range as an explanatory factor) and when the interactions between weeks and  
216 population were significant, we conducted post hoc pairwise comparisons between the initial  
217 location of the eggs and their location at each week using Exact Mann-Whitney Rank Sum  
218 tests. To correct for multiple testing, the P-values of these pairwise comparisons were  
219 adjusted using the False Discovery Rate (fdr) method (Benjamini and Hochberg 1995). The  
220 likelihood to produce at least one larva was tested using a Generalized linear model with  
221 binomial error distribution. In this model, the presence of at least one hatched juvenile was  
222 used as a binary response (1 or 0), while the population, the range of temperatures and their  
223 interaction were entered as explanatory factors. The analyses were conducted with the  
224 software R v4.1.1 (R Core Team, 2017) loaded with the packages *car* (Fox and Weisberg 2019),  
225 *exactRankTests* (Hothorn and Hornik 2021), *emmeans* (Lenth 2021) and *DHARMA* (Hartig  
226 2020).

## RESULTS

227 The maximum temperature range at which each female was observed during the 15 days  
228 preceding oviposition was greater in SJNL compared to HNB females (Fig 2A;  $W = 53$ ,  $P <$   
229  $0.001$ ). Interestingly, the warmest location at which females have been observed was larger  
230 in SJNL compared to HNB females (Fig 2B;  $W = 2$ ,  $P < 0.001$ ), whereas the coldest location was  
231 independent of the population (Fig 2C;  $W = 135.5$ ,  $P = 0.404$ ).

232 The temperature of the area where females laid their eggs was higher in SJNL  
233 compared to HNB females (Fig 3A;  $W = 17.5$ ,  $P < 0.001$ ). Moreover, HNB females produced

234 their eggs earlier in the season (Fig 3B;  $W = 38$ ,  $P < 0.001$ ) and laid overall more eggs (Fig 3C;  
235  $W = 261$ ,  $P < 0.001$ ) compared to SJNL females.

236 During the 15 weeks following oviposition, the location of the eggs varied according to  
237 the weeks, population and temperature range (Figure 4; Triple interaction between weeks,  
238 population and range of temperature:  $\chi^2_5 = 33.13$ ,  $P < 0.001$ ). Egg location depended on an  
239 interaction between weeks and population in the warmest range of temperatures ( $\chi^2 = 12.43$ ,  
240  $P < 0.001$ ), which reveals that SJNL females moved their eggs towards warmer locations about  
241 7 weeks after oviposition, whereas HNB females did not specifically target warmer locations  
242 (Figure 4). Moreover, egg location also depended on an interaction between weeks and  
243 population in both the intermediate and coldest range of temperatures ( $\chi^2 = 16.53$ ,  $P < 0.001$   
244 and  $\chi^2 = 6.27$ ,  $P = 0.012$ , respectively), showing that both SJNL and HNB females moved their  
245 eggs towards warmer locations but that this move started earlier in SJNL compared to HNB  
246 populations (Figure 4). Interestingly, egg transport was always associated with the  
247 construction of a new nest in which the eggs were moved.

248 Finally, the likelihood to produce juveniles (i.e. that at least one egg hatched) was  
249 overall higher in HNB compared to SJNL females (Figure 5A; Likelihood ratio  $\chi^2 = 8.52$ ,  $P =$   
250  $0.004$ ), overall higher in females previously maintained under the warmest range of  
251 temperature compared to the two others ranges (Figure 5B, Likelihood ratio  $\chi^2 = 8.09$ ,  $P =$   
252  $0.018$ ), and independent on an interaction between these two factors (Likelihood ratio  $\chi^2 =$   
253  $3.49$ ,  $P = 0.175$ ). When they hatched, the temperature of the place at which the first juveniles  
254 has been observed was not population-dependent (Figure 5C;  $W = 60$ ,  $P = 0.396$ ), while the  
255 eggs took overall more time to develop in HNB compared to SJNL females (Figure 5D;  $W =$   
256  $80.5$ ,  $P = 0.012$ ).

257           The COI analyses revealed that each population contained a different member of the  
258 complex of species composing the European earwig. All (6/6) HNB females belonged to the  
259 species "*Forficula auricularia A*" and all (6/6) SJNL females belonged to the species "*Forficula*  
260 *auricularia B*".

## DISCUSSION

261 While temperature often drives oviposition site selection to ensure that the lack of egg  
262 mobility does not result in exposure to sub-optimal or extreme temperatures (Pike et al. 2012,  
263 Li et al. 2018, Ostap-Chec et al. 2021), the role of temperature on oviposition site selection is  
264 less clear when mothers have the capability to transport the eggs after oviposition. Here, we  
265 show in the European earwig that this capability does not prevent females from selecting  
266 oviposition sites according to temperature, that egg transport can indeed help mothers to  
267 adjust egg temperature after oviposition and, interestingly, that the selected temperatures by  
268 mothers are population-specific. In particular, we show that St John's (Newfoundland and  
269 Labrador, Canada) females explore a greater ranges of temperatures before oviposition, lay  
270 their eggs in warmer areas, move their eggs quicker toward warm locations when suddenly  
271 exposed to cold, but were overall less likely to produce juveniles under our experimental  
272 conditions compared to Harvey station (New Brunswick, Canada) females.

273           Our data first reveal that earwig females of the two populations chose oviposition sites  
274 with temperatures above 10°C, which is in stark contrast to the sub-zero temperatures  
275 measured above ground in these two locations during the oviposition period (Figure 1). This  
276 finding highlights the fact that some ectotherms, such as earwigs, cannot only develop  
277 physiological mechanisms to withstand their own freezing during wintering (Toxopeus and

278 Sinclair 2018) but also need to find places exhibiting a large thermal difference from the  
279 ground surface to establish their nests and deposit their eggs (Leather et al. 1993). Multiple  
280 strategies have been reported in insects to achieve this goal, among which digging nests or  
281 burrows to get efficient isolation from above-ground temperatures (Davis et al. 2015, Huang  
282 et al. 2020), hiding under rocks and nesting into trunks to use the thermal inertia of the  
283 substrate as a shelter (Brower et al. 2009, Trájer et al. 2014), and nesting close to human  
284 constructions (e.g. underground pipeline, houses, building walls, etc) to benefit from their  
285 constant source of heat during winter (Labrie et al. 2008, Trájer et al. 2014). These three  
286 strategies are likely to be adopted by the European earwig, as earwig adults are frequently  
287 found in human habitations, underground burrows and under rock and trunks during winter  
288 (Goodacre 1997, Gingras and Tourneur 2001, Kölliker and Vancassel 2007, Binns et al. 2021).  
289 Moreover, a study suggests that the nest proximity to human constructions could be an  
290 effective overwintering strategy for Canadian populations of earwigs (Goodacre 1997).

291         After oviposition, we showed that earwig mothers of the two populations  
292 experimentally exposed to temperatures below 5°C transported their eggs to warmer  
293 locations and that the eggs subsequently kept above 5°C (i.e. a temperature reachable in the  
294 warmest temperature range) were most likely to hatch. These results overall support the  
295 hypothesis that egg transport is an adaptive post-oviposition behaviour by which earwig  
296 mothers adjust the thermal needs of their embryos. This discovery sheds light on a new  
297 strategy in female insects that overwinter with their eggs for coping with temperature changes  
298 (Lee and Dellinger 1991, Sinclair et al. 2003), and emphasizes that the potential costs  
299 associated with building a nest and finding a burrow in another location during winter do not  
300 prevent such egg transport (Danks 2002). More generally, the egg transport capability of  
301 earwig females combined with their oviposition site selection based on temperature could

302 explain, at least in part, how such an insect with long-overwintering eggs has been able to  
303 invade extremely cold climates (Guillet et al. 2000a, Quarrell et al. 2018, Hill et al. 2019,  
304 Tourneur and Meunier 2020).

305         Interestingly, St John's females transported their eggs much earlier than Harvey station  
306 females. This suggests that the cold tolerance of eggs in the first few weeks after egg laying is  
307 less effective at St John's than at Harvey station due to either population-specific egg quality,  
308 as reported in numerous oviparous species (Jing and Kang 2003, Stålhandske et al. 2015), or  
309 population-specific egg development time, as eggs sensitivity to cold often increases when  
310 they are closer to hatching (e.g. Gray, 2009). In line with the last scenario, egg development  
311 time greatly varies between natural populations of the European earwig (Tourneur and  
312 Gingras 1992, Meunier et al. 2012, Ratz et al. 2016, Tourneur and Meunier 2020), and our data  
313 shows that eggs produced by St John's females indeed take less time to hatch compared to  
314 eggs produced by Harvey station females when reared in similar conditions. On a more general  
315 level, it is typically expected that a population-specific cold tolerance of eggs should lead to  
316 population-specific timing of oviposition, the less cold-tolerant eggs being laid later in winter  
317 than the more cold-tolerant eggs (Tourneur and Meunier 2020). This is again in line with our  
318 results: St John's females laid eggs about one month after Harvey station females. Overall, our  
319 results thus demonstrate that winter temperatures are an important factor in the pre-and  
320 post-oviposition strategies of earwig females.

321         Overall, our data reveal population-specific patterns regarding the thermal preferences  
322 of females before and at the time of oviposition, and their egg transport dynamics. The  
323 European earwig is a complex of cryptic species, for which genetic divergence and  
324 reproductive isolation are well established (Wirth et al. 1998, Guillet et al. 2000a, González-

325 Miguéns et al. 2020) but the specificity of life-history traits remains largely unexplored. The  
326 only reported species-specific trait refers to their reproduction, with females of species “A”  
327 producing one clutch and females of species “B” producing two clutches (Wirth et al. 1998,  
328 Tourneur 2018). However, some studies revealed that the number of clutches produced by a  
329 female is not always fixed and can vary between populations of the same *F. auricularia* species  
330 (Tourneur and Gingras 1992, Ratz et al. 2016), as well as depend on numerous parameters  
331 acting during the early life of an earwig female (Meunier et al. 2012, Meunier and Kölliker  
332 2012, Wong and Kölliker 2014). This could suggest that local adaptations, rather than  
333 membership of species 'A' or 'B', might be the prime driver of life-history traits in this complex  
334 of species (Quarrell et al. 2018, Tourneur and Meunier 2020). In this study, our genetic  
335 analyses demonstrate that females of Harvey station belong to species “A” and females of St  
336 John’s to species “B” (note that this is the first time that species “B” is found in Canada outside  
337 British Columbia) which could support species-specific thermal preferences and dynamic of  
338 egg transport, but both Harvey station and St John’s exhibit very close temperature regimes  
339 (Figure 1), which could also suggest that species-specific traits are a likely explanation. Further  
340 studies such as transplant experiments are thus needed to disentangle whether the reported  
341 patterns reflect local adaptation and/or novel species-specific traits within the European  
342 earwig complex (Wirth et al. 1998, Guillet et al. 2000a, González-Miguéns et al. 2020).

343       Whereas ectotherms typically have very limited to no physiological capacities to limit  
344 the costs of exposure to extreme temperatures via internal regulations (Stevenson 1985),  
345 some have evolved forms of behavioural thermoregulation to avoid locations with extreme  
346 temperatures (Lee Jr. 1991, Terrien 2011). In this study, we demonstrate that ectotherm  
347 females of the European earwig adopt a broad set of behavioural thermoregulations when  
348 tending their eggs overwinter. In particular, they select oviposition sites exhibiting specific



349 temperatures and transport their eggs to warmer locations when experimentally exposed to  
350 cold. While this set of behavioural thermoregulations is present in the two studied  
351 populations, its modality of expression varied between Harvey station and St John's – either  
352 as a result of local adaptation or as species-specific traits among the complex of species  
353 composing the European earwig (Wirth et al. 1998, Guillet et al. 2000a, González-Miguéns et  
354 al. 2020). Overall, our findings emphasize that earwig females have evolved behavioural  
355 strategies to mitigate the risks inherent to tending eggs during several months and extreme  
356 winter cold. More generally, they highlight the diversity of behaviours that insects can adopt  
357 to cope with extreme temperatures, and which could favour their tolerance to the effects of  
358 moderate climate change.

#### DATA ACCESSIBILITY

359 The complete data set and R script are archived and freely available in the open data  
360 repository Zenodo (<https://doi.org/10.5281/zenodo.5718267>).

#### REFERENCES

- 361 Altschul, S. F. et al. 1990. Basic local alignment search tool. - J. Mol. Biol. 215: 403–410.
- 362 Benjamini, Y. and Hochberg, Y. 1995. Controlling the false discovery rate: a practical and  
363 powerful approach to multiple testing. - J. R. Stat. Soc. Ser. B 57: 289–300.
- 364 Binns, M. et al. 2021. Lifecycle of the invasive omnivore, *Forficula auricularia* ,  
365 in Australian grain growing environments. - Pest Manag. Sci. 77: 1818–1828.
- 366 Boos, S. et al. 2014. Maternal care provides antifungal protection to eggs in the European

- 367 earwig. - Behav. Ecol. 25: 754–761.
- 368 Brodin, T. et al. 2006. Predator related oviposition site selection of aquatic beetles  
369 (Hydroporus spp.) and effects on offspring life-history. - Freshw. Biol. 51: 1277–1285.
- 370 Brower, L. P. et al. 2009. Oyamel fir forest trunks provide thermal advantages for  
371 overwintering monarch butterflies in Mexico. - Insect Conserv. Divers. 2: 163–175.
- 372 Carrasco, D. and Kaitala, A. 2009. Egg-laying tactic in *Phyllomorpha laciniata* in the presence  
373 of parasitoids. - Entomol. Exp. Appl. 131: 300–307.
- 374 Cordero, G. A. et al. 2018. Reptile embryos are not capable of behavioral thermoregulation  
375 in the egg. - Evol. Dev. 20: 40–47.
- 376 Courtney, S. P. 1981. Coevolution of pierid butterflies and their cruciferous foodplants - III.  
377 *Anthocharis cardamines* (L.) survival, development and oviposition on different  
378 hostplants. - Oecologia 51: 91–96.
- 379 Danks, H. V 2002. Modification of adverse conditions by insects. - Oikos 99: 10–24.
- 380 Davis, J. M. et al. 2015. Big maggots dig deeper: size-dependent larval dispersal in flies. -  
381 Oecologia 179: 55–62.
- 382 Diehl, J. M. and Meunier, J. 2018. Surrounding pathogens shape maternal egg care but not  
383 egg production in the European earwig (L Holman, Ed.). - Behav. Ecol. 29: 128–136.
- 384 Dillon, M. E. et al. 2009. Thermal preference in *Drosophila*. - J. Therm. Biol. 34: 109–119.
- 385 Fey, S. B. et al. 2015. Recent shifts in the occurrence, cause, and magnitude of animal mass  
386 mortality events. - Proc. Natl. Acad. Sci. U. S. A. 112: 1083–1088.
- 387 Filazzola, A. et al. 2021. The direct and indirect effects of extreme climate events on insects. -  
388 Sci. Total Environ. 769: 145161.

- 389 Fox, J. and Weisberg, S. 2019. An R Companion to Applied Regression, Third edition. Sage,  
390 Thousand Oaks CA. in press.
- 391 Gingras, J. and Tourneur, J.-C. 2001. Timing of adult mortality, oviposition, and hatching  
392 during the underground phase of *Forficula auricularia* (Dermaptera: Forficulidae). - Can.  
393 Entomol. 133: 269–278.
- 394 González-Miguéns, R. et al. 2020. Speciation patterns in the *Forficula auricularia* species  
395 complex: cryptic and not so cryptic taxa across the western Palaearctic region. - Zool. J.  
396 Linn. Soc. 190: 788–823.
- 397 Goodacre, S. 1997. The overwintering biology of the European earwig *Forficula auricularia*  
398 Linneaus (Insecta: Dermaptera: Forficulinae).
- 399 Gould, J. et al. 2021. Complex trade-offs in oviposition site selection in a cannibalistic frog. -  
400 Anim. Behav. 175: 75–86.
- 401 Gray, D. R. 2009. Age-dependent postdiapause development in the gypsy moth  
402 (Lepidoptera: Lymantriidae) life stage model. - Environ. Entomol. 38: 18–25.
- 403 Guillet, S. et al. 2000a. Multiple introductions of the *Forficula auricularia* species complex  
404 (Dermaptera: Forficulidae) in eastern North America. - Can. Entomol. 132: 49–57.
- 405 Guillet, S. et al. 2000b. Analysis of a contact zone in the *Forficula auricularia* L. (Dermaptera:  
406 Forficulidae) species complex in the Pyrenean Mountains. - Heredity (Edinb). 85: 444–  
407 449.
- 408 Hajibabaei, M. et al. 2006. DNA barcodes distinguish species of tropical Lepidoptera. - Proc.  
409 Natl. Acad. Sci. U. S. A. 103: 968–971.
- 410 Hance, T. et al. 2007. Impact of extreme temperatures on parasitoids in a climate change

- 411 perspective. - Annu. Rev. Entomol. 52: 107–126.
- 412 Hartig, F. 2020. DHARMA: Residual diagnostic for hierarchical (Multi-level / mixed) regression  
413 models.
- 414 Hill, M. P. et al. 2019. Climate, human influence and the distribution limits of the invasive  
415 European earwig, *Forficula auricularia*, in Australia. - Pest Manag. Sci. 75: 134–143.
- 416 Hirayama, H. and Kasuya, E. 2013. Effect of adult females' predation risk on oviposition site  
417 selection in a water strider. - Entomol. Exp. Appl. 149: 250–255.
- 418 Hothorn, T. and Hornik, K. 2021. Exact distributions for rank and permutation tests. R  
419 package version v0.8-34. in press.
- 420 Huang, J. et al. 2020. Low-temperature derived temporal change in the vertical distribution  
421 of *Sesamia inferens* larvae in winter, with links to its latitudinal distribution. - PLoS One  
422 15: 1–15.
- 423 Jing, X. H. and Kang, L. 2003. Geographical variation in egg cold hardiness: A study on the  
424 adaptation strategies of the migratory locust *Locusta migratoria* L. - Ecol. Entomol. 28:  
425 151–158.
- 426 Kölliker, M. 2007. Benefits and costs of earwig (*Forficula auricularia*) family life. - Behav.  
427 Ecol. Sociobiol. 61: 1489–1497.
- 428 Kölliker, M. and Vancassel, M. 2007. Maternal attendance and the maintenance of family  
429 groups in common earwigs (*Forficula auricularia*): a field experiment. - Ecol. Entomol.  
430 32: 24–27.
- 431 Körner, M. et al. 2018. Extended winters entail long-term costs for insect offspring reared in  
432 an overwinter burrow. - J. Therm. Biol. 74: 116–122.

- 433 Labrie, G. et al. 2008. Overwintering strategy of multicolored Asian lady beetle (Coleoptera:  
434 Coccinellidae): Cold-free space as a factor of invasive success. - Ann. Entomol. Soc. Am.  
435 101: 860–866.
- 436 Lamb, R. J. 1976. Parental behavior in the dermaptera with special reference to *Forficula*  
437 *auricularia* (Dermaptera: Forficulidae). - Can. Entomol. 108: 609–619.
- 438 Lambret, P. et al. 2018. Oviposition plant choice maximizes offspring fitness in an aquatic  
439 predatory insect. - Hydrobiologia 823: 1–12.
- 440 Leather, S. R. et al. 1993. The ecology of insect overwintering. - Cambridge University Press.
- 441 Lee, R. E. and Dellinger, D. L. 1991. Insects at low temperatures. - Chapman and Hall.
- 442 Lee Jr., R. E. 1991. Principles of Insect Low Temperature Tolerance. - In: Lee Jr., R. E. and  
443 Denlinger, D. L. (eds), Insects at Low Temperature. Springer US, pp. 17–43.
- 444 Lenth, R. V 2021. emmeans: Estimated Marginal Means, aka Least-Squares Means. R package  
445 version 1.5.5-1. in press.
- 446 Li, S. et al. 2018. Female lizards choose warm, moist nests that improve embryonic  
447 survivorship and offspring fitness (R Wilson, Ed.). - Funct. Ecol. 32: 416–423.
- 448 Liu, Z. et al. 1997. Female feeding aid in common earwig *Forficula auricularia* L. - Entomol.  
449 Sin. 4: 67–73.
- 450 Machado, G. and Trumbo, S. T. 2018. Parental care. - In: Cordoba-aguilar, A. et al. (eds),  
451 Insect behavior: from mechanisms to ecological and evolutionary consequences. Oxford  
452 University Press, pp. 203–218.
- 453 Meunier, J. and Kölliker, M. 2012. Parental antagonism and parent-offspring co-adaptation  
454 interact to shape family life. - Proc. R. Soc. London B Biol. Sci. 279: 3981–8.

- 455 Meunier, J. et al. 2012. One clutch or two clutches? Fitness correlates of coexisting  
456 alternative female life-histories in the European earwig. - *Evol. Ecol.* 26: 669–682.
- 457 Meunier, J. et al. 2020. Sublethal exposure to deltamethrin impairs maternal egg care in the  
458 European earwig *Forficula auricularia*. - *Chemosphere* 258: 127383.
- 459 Mortola, J. P. and Gaonac'h-Lovejoy, V. 2016. The cooling time of fertile chicken eggs at  
460 different stages of incubation. - *J. Therm. Biol.* 55: 7–13.
- 461 Muturi, E. J. et al. 2014. Influence of biofuel crops on mosquito production and oviposition  
462 site selection. - *GCB Bioenergy* 6: 61–66.
- 463 Nicolai, A. et al. 2013. Well wrapped eggs: Effects of egg shell structure on heat resistance  
464 and hatchling mass in the invasive land snail *Cornu aspersum*. - *J. Exp. Zool. Part A Ecol.*  
465 *Genet. Physiol.* 319: 63–73.
- 466 Ostap-Chec, M. et al. 2021. Red mason bee (*Osmia bicornis*) thermal preferences for nest  
467 sites and their effects on offspring survival. - *Apidologie* 52: 707–719.
- 468 Petranka, J. W. and Fakhoury, K. 1991. Evidence of a chemically-mediated avoidance  
469 response of ovipositing insects to blue-gills and green frog tadpoles. - *Copeia* 1991:  
470 234–239.
- 471 Pike, D. A. et al. 2012. Hot mothers, cool eggs : nest-site selection by thermal optima egg-  
472 guarding spiders accommodates conflicting. - *Funct. Ecol.* 26: 469–475.
- 473 Quarrell, S. R. et al. 2018. The invasion biology of the invasive earwig, *Forficula auricularia* in  
474 Australasian ecosystems. - *Biol. Invasions* 20: 1553–1565.
- 475 Ratz, T. et al. 2016. The population determines whether and how life-history traits vary  
476 between reproductive events in an insect with maternal care. - *Oecologia* 182: 443–

- 477           452.
- 478   Refsnider, J. M. and Janzen, F. J. 2010. Putting eggs in one basket: Ecological and  
479           evolutionary hypotheses for variation in oviposition-site choice. - *Annu. Rev. Ecol. Evol.*  
480           *Syst.* 41: 39–57.
- 481   Sicsú, P. R. et al. 2020. Lady beetle oviposition site choices: Maternal effects on offspring  
482           performance. - *Florida Entomol.* 103: 228–235.
- 483   Silberbush, A. and Blaustein, L. 2011. Mosquito females quantify risk of predation to their  
484           progeny when selecting an oviposition site. - *Funct. Ecol.* 25: 1091–1095.
- 485   Sinclair, B. J. et al. 2003. Insects at low temperatures: An ecological perspective. - *Trends*  
486           *Ecol. Evol.* 18: 257–262.
- 487   Smith, R. L. 1997. Evolution of paternal care in the giant water bugs (Heteroptera:  
488           Belostomatidae. - In: Choe, J. C. and Crespi, B. J. (eds), *The evolution of social behavior*  
489           in insects and arachnids. Cambridge University Press, pp. 116–149.
- 490   Spencer, M. et al. 2002. Oviposition habitat selection by mosquitoes (*Culisera longiareolata*)  
491           and consequences for population size. - *Ecology* 83: 669–679.
- 492   Stålhandske, S. et al. 2015. Effect of winter cold duration on spring phenology of the orange  
493           tip butterfly, *Anthocharis cardamines*. - *Ecol. Evol.* 5: 5509–5520.
- 494   Stevenson, R. D. 1985. The relative importance of behavioral and physiological adjustments  
495           controlling body temperature in terrestrial ectotherms. - *Am. Nat.* 126: 362–386.
- 496   Takahashi, M. 2007. Oviposition site selection: Pesticide avoidance by gray treefrogs. -  
497           *Environ. Toxicol. Chem.* 26: 1476–1480.
- 498   Terrien, J. 2011. Behavioral thermoregulation in mammals: a review. - *Front. Biosci.* 16:

- 499           1428.
- 500   Thesing, J. et al. 2015. Short-term benefits, but transgenerational costs of maternal loss in an  
501           insect with facultative maternal care. - Proc. R. Soc. London B Biol. Sci. 282: 20151617.
- 502   Thompson, J. N. 1988. Evolutionary ecology of the relationship between oviposition  
503           preference and performance of offspring in phytophagous insects. - Entomol. Exp. Appl.  
504           47: 3–14.
- 505   Tourneur, J.-C. 2018. Factors affecting the egg-laying pattern of *Forficula auricularia*  
506           (Dermoptera: Forficulidae) in three climatologically different zones of North America. -  
507           Can. Entomol. 150: 511–519.
- 508   Tourneur, J.-C. and Gingras, J. 1992. Egg laying in a northeastern North American (Montréal,  
509           Québec) population of *Forficula auricularia* L. (Dermoptera: Forficulidae). - Can.  
510           Entomol. 124: 1055–1061.
- 511   Tourneur, J.-C. and Meunier, J. 2020. Variations in seasonal (not mean) temperatures drive  
512           rapid adaptations to novel environments at a continent scale. - Ecology 101: e02973.
- 513   Toxopeus, J. and Sinclair, B. J. 2018. Mechanisms underlying insect freeze tolerance. - Biol.  
514           Rev. 93: 1891–1914.
- 515   Trájer, A. et al. 2014. The combined impact of urban heat island, thermal bridge effect of  
516           buildings and future climate change on the potential overwintering of *Phlebotomus*  
517           species in a central European metropolis. - Appl. Ecol. Environ. Res. 12: 887–908.
- 518   Van Meyel, S. et al. 2019. Love them all: mothers provide care to foreign eggs in the  
519           European earwig *Forficula auricularia*. - Behav. Ecol. 30: 756–762.
- 520   Wang, S. F. et al. 2010. Comparative study on thermotolerance of *Artemia* resting eggs from



- 521 Qinghai-Xizang Plateau, China. - *Aquaculture* 307: 141–149.
- 522 Wirth, T. et al. 1998. Molecular and reproductive characterization of sibling species in the  
523 european earwig (*Forficula auricularia*). - *Evolution* 52: 260.
- 524 Wong, J. W. Y. and Kölliker, M. 2014. Effects of food restriction across stages of juvenile and  
525 early adult development on body weight, survival and adult life history. - *J. Evol. Biol.*  
526 27: 2420–30.
- 527 Yang, C. et al. 2018. Keeping eggs warm: thermal and developmental advantages for  
528 parasitic cuckoos of laying unusually thick-shelled eggs. - *Sci. Nat.* 105: 10.
- 529

530 **Figure 1** – Locations of Harvey Station (HNB, Canada; Blue) and St Johns (SJNL, Canada;  
531 Orange), and their monthly variation of temperatures recorded from 1970 to 2000. Dots  
532 depict mean monthly temperatures, with whiskers extending from minimum to maximum  
533 mean temperatures. These data were extracted from the WorldClim database.

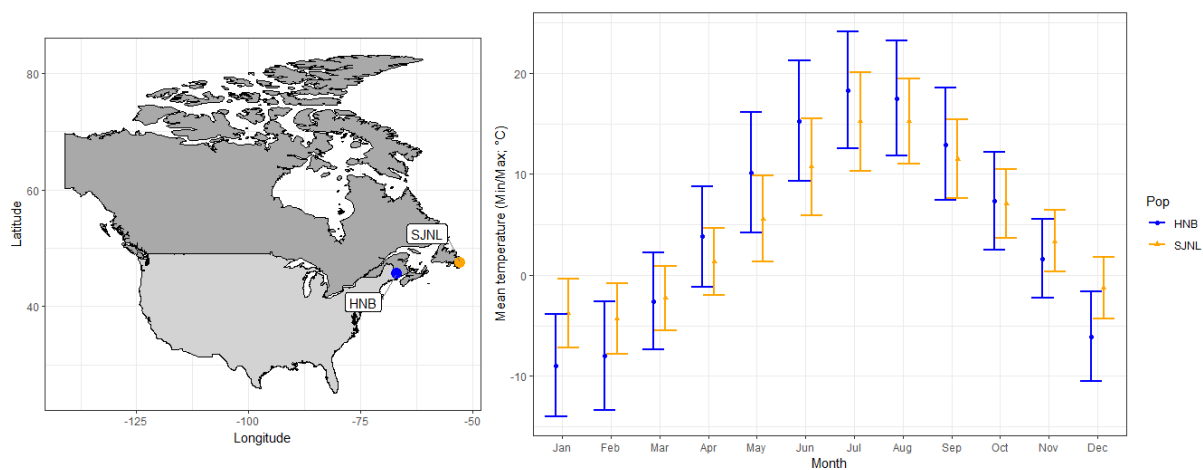

534

535 **Figure 2** – Effect of population on the (A) maximum temperature range, (B) warmest location  
536 and (C) coldest location at which females were observed during the 15 days preceding  
537 oviposition. Box plots depict median (middle bar) and interquartile range (light bar), with  
538 whiskers extending to 1.5 times the interquartile range and dots representing experimental  
539 values. \*\*\* $P < 0.001$ ; ns  $P > 0.05$ . HNB: Harvey Station. SJNL: St Johns.

540

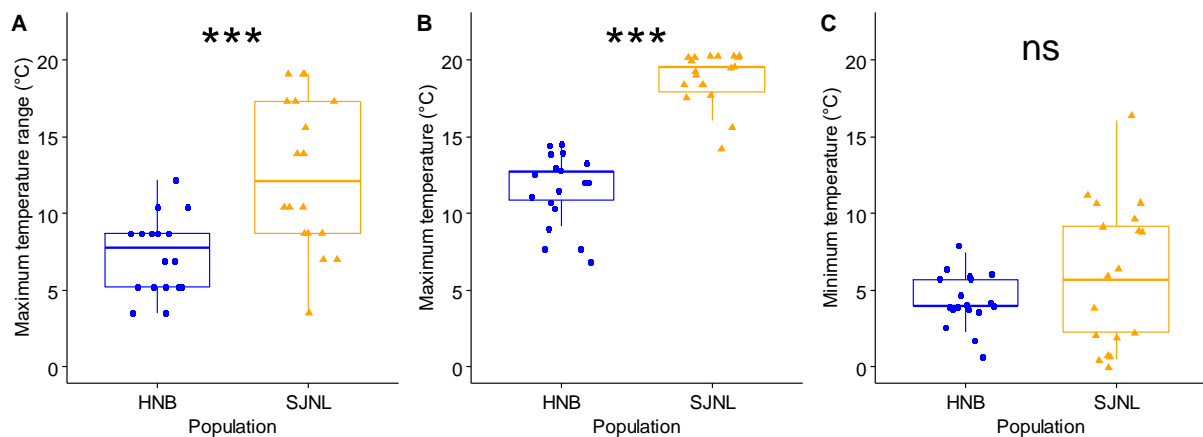

541

542 **Figure 3** – Effect of population on the (A) temperature of the location at which females laid  
543 eggs, (B) day at which females laid eggs, and the (C) number of eggs produced. Box plots depict  
544 median (middle bar) and interquartile range (light bar), with whiskers extending to 1.5 times  
545 the interquartile range and dots representing experimental values. The oviposition day  
546 corresponds to the number of day after the 16 November 2020. \*\*\*P<0.001. HNB: Harvey  
547 Station. SJNL: St Johns.

548

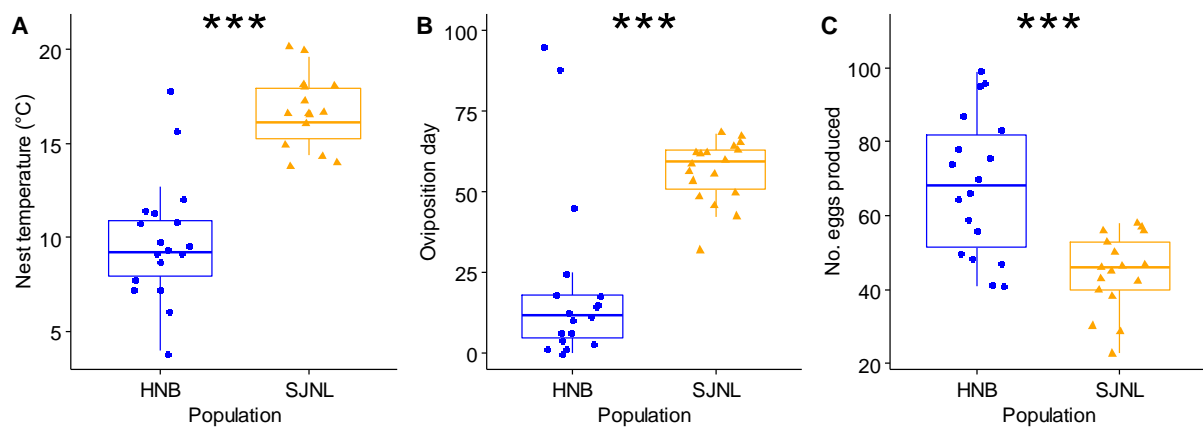

549

550 **Figure 4** – Effect of population and thermal ranges on egg location during the 15 weeks  
551 following oviposition. Brackets indicate thermal ranges. Dashed lines indicate the location of  
552 mothers and eggs when the experiment was set up. Grey dots are raw values for each clutch  
553 of eggs. Coloured dots are mean values  $\pm$  SE per week. Exact Mann-Whitney tests to compare  
554 values of each week to the initial temperature: \*\*P<0.01, \*P<0.05. P-values corrected for  
555 multiple comparisons. HNB: Harvey Station. SJNL: St Johns.

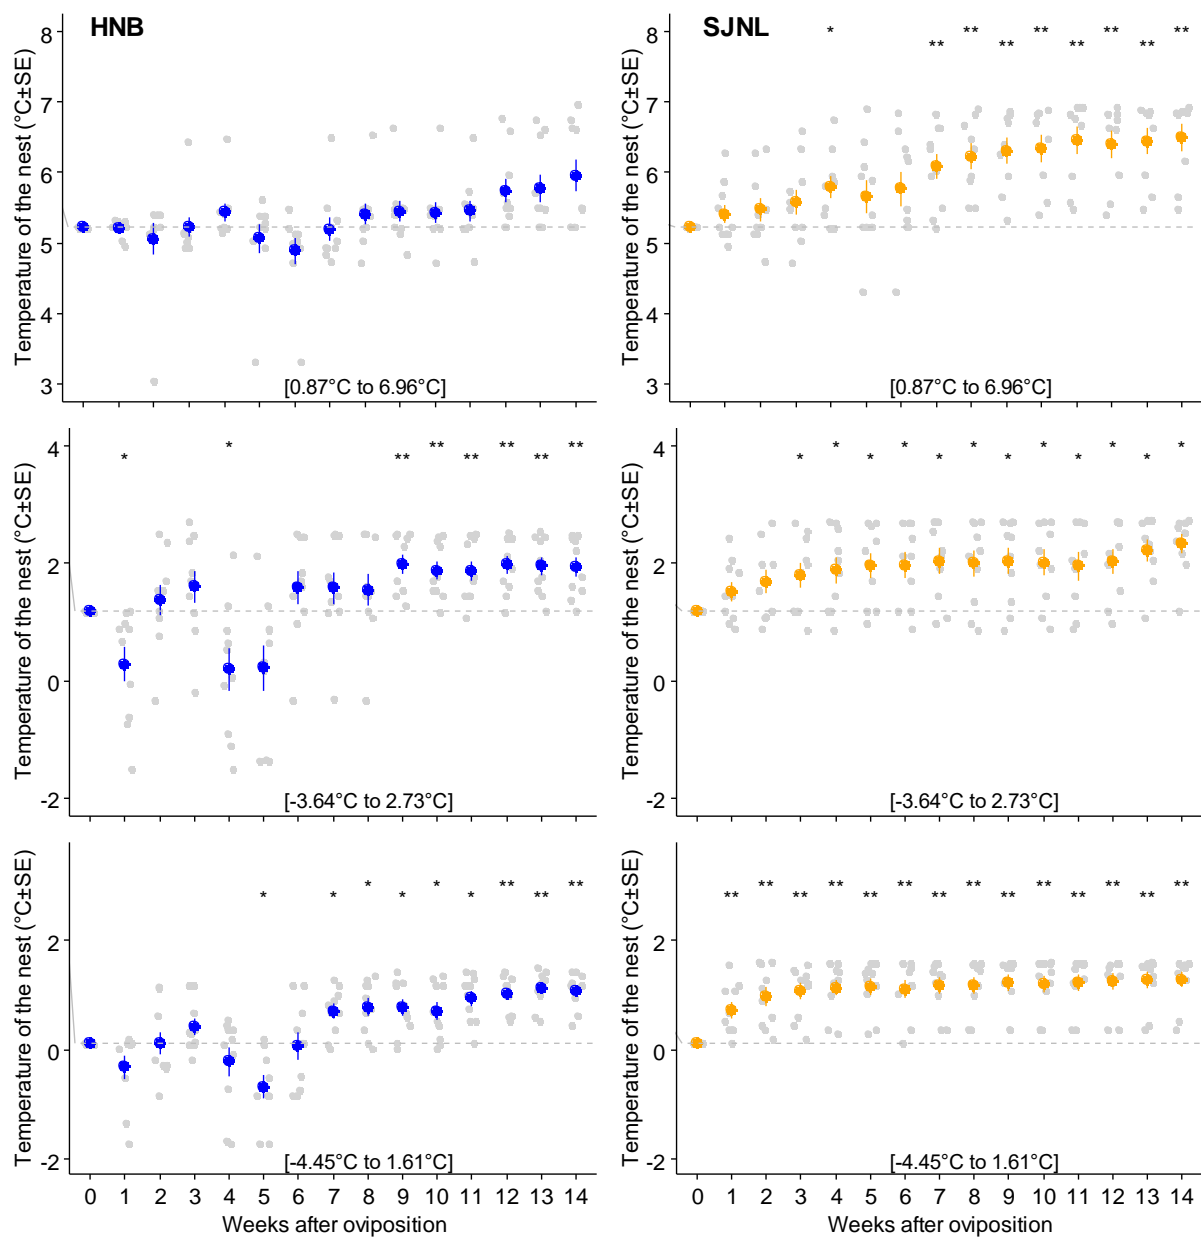

556

557

558 **Figure 5** – Effect of (A, B) population and thermal constraints on the percentage of females  
559 with at least one hatched egg, (C) population on the location of eggs at egg hatching and of  
560 (D) population on the number of weeks between oviposition and egg hatching – when present.  
561 Figures C and D only involved females from the warmest range of temperature, as their  
562 number were too limited in the other range of temperatures. Box plots depict median (middle  
563 bar) and interquartile range (light bar), with whiskers extending to 1.5 times the interquartile  
564 range and dots representing experimental values. ns:  $P > 0.05$ ; \* $P < 0.05$ ; \*\* $P < 0.01$ ; ·  $p = 0.07$ .  
565 Different letters indicate  $P < 0.05$ . HNB: Harvey Station. SJNL: St Johns.

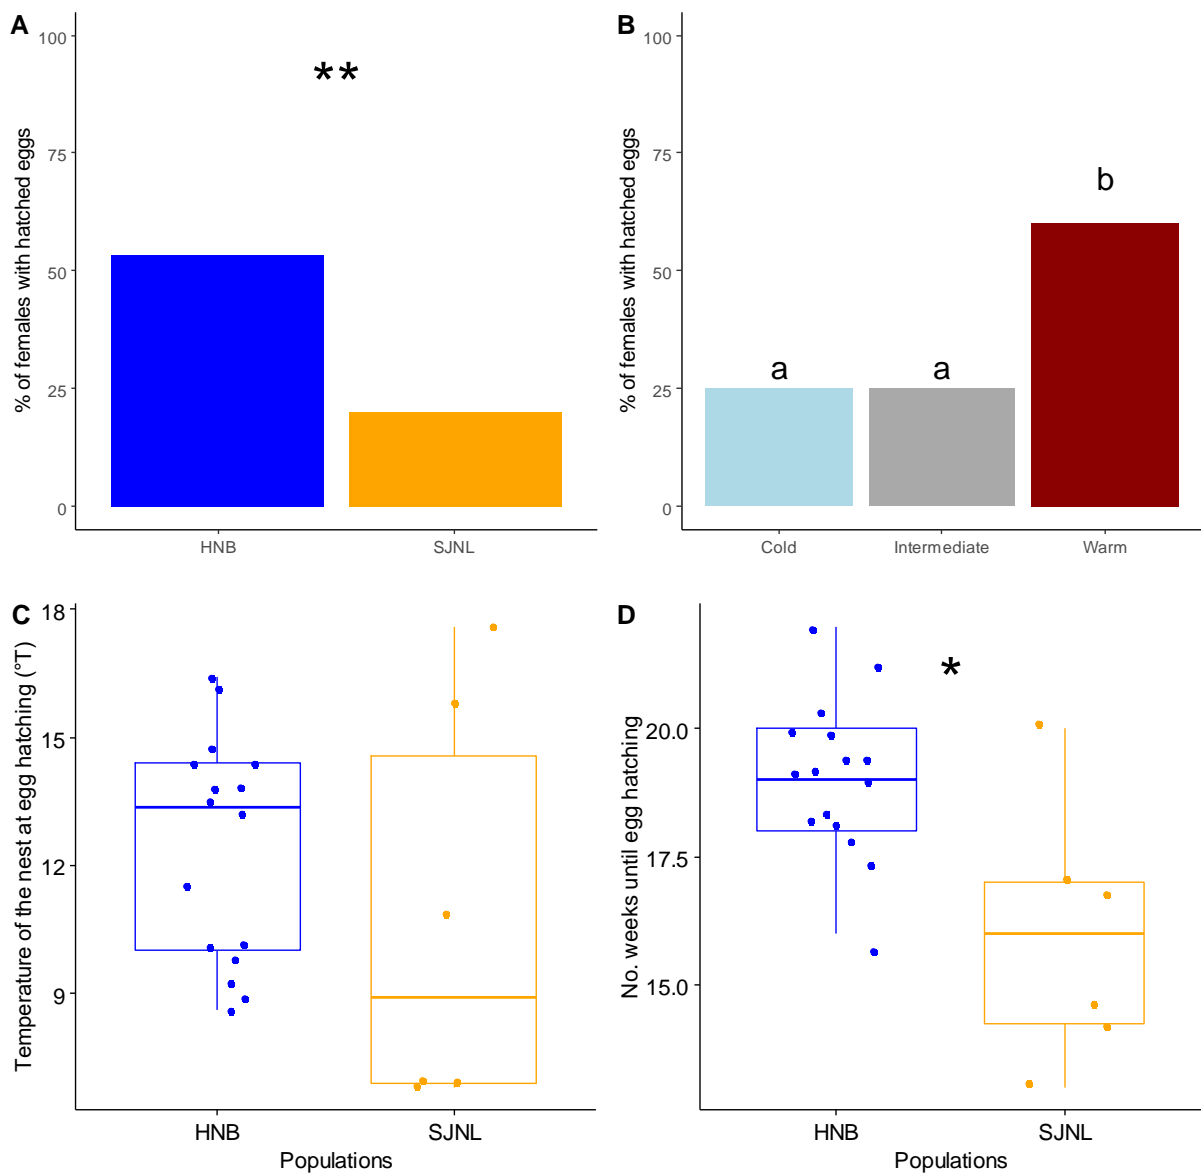

567

**SUPPLEMENTARY MATERIAL**

568

569 **Figure S1** – Thermal gradient and equation of the thermal bridge – measurements before and

570 at oviposition.

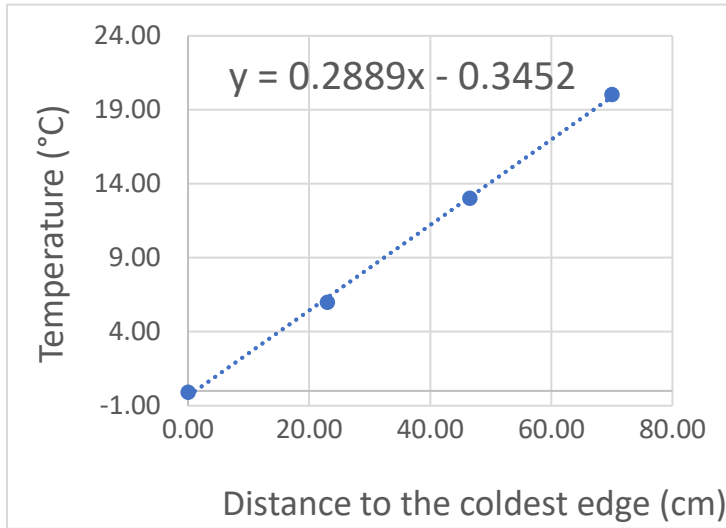

571

572 **Figure S2** – Thermal gradients and equations of the (A) warmest, (B) intermediate and (C)  
573 coldest temperature ranges in the climate cabinet – measurements after oviposition.

574

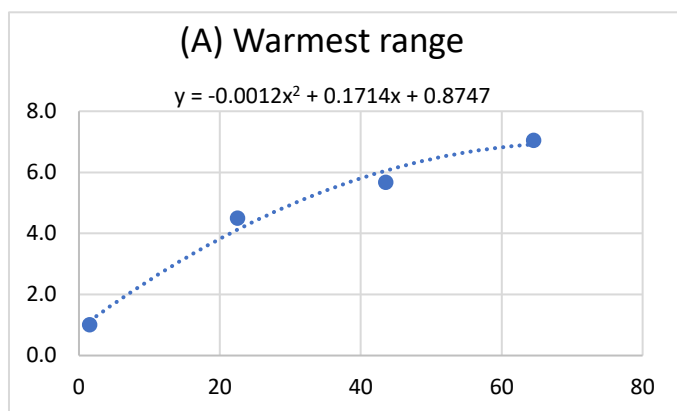

575

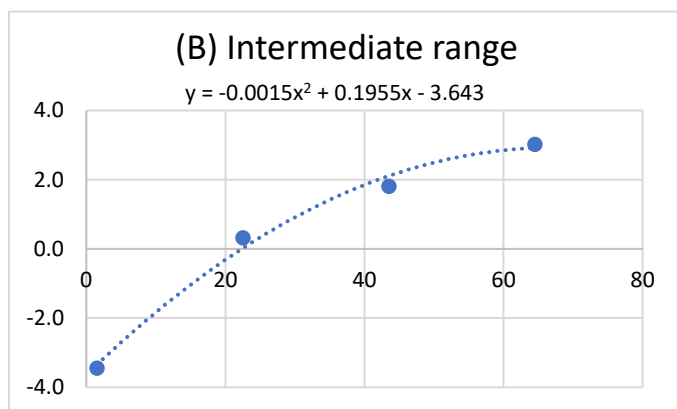

576

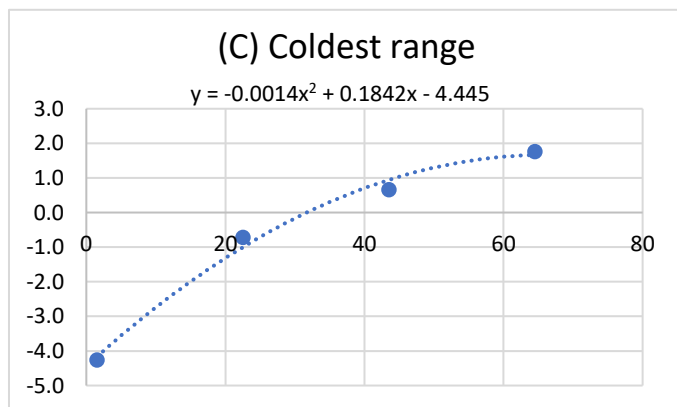

Source: https://www.biorxiv.org/content/10.1101/2021.11.23.469705v1.full.pdf
